# Supplementary material for: Alpha-synuclein oligomers and fibrils originate in two distinct conformer pools: a small angle X-ray scattering and ensemble optimisation modelling study
Source: Royal Society of Chemistry journal article supplement (doi:10.1039/c4mb00356j), 2014-10-21

## Supporting Information

### Alpha-synuclein Oligomers and Fibrils may originate in Two Distinct Conformer Pools: A Small Angle X-ray Scattering and Ensemble Optimisation Modelling Study

Cyril C. Curtain<sup>1,2</sup>, Nigel Kirby<sup>3</sup>, Kevin J. Barnham<sup>1,2</sup>, Robert B. Knott<sup>4</sup>, Colin L. Masters<sup>2</sup>, Roberto Cappai<sup>1</sup>, Agata Rekas<sup>4</sup>, Vijaya B. Kench<sup>2</sup> and Timothy M. Ryan<sup>2</sup>

<sup>1</sup>*Department of Pathology and Bio21 Molecular Science and Technology Institute, The University of Melbourne, Victoria 3010, Australia.*

<sup>2</sup>*The University of Melbourne, Florey Institute of Neuroscience and Mental Health, Victoria 3010, Australia.*

<sup>3</sup>*SAXS/WAXS Beamline, The Australian Synchrotron, Clayton, Victoria 3168, Australia*

<sup>4</sup>*Australian Nuclear Science and Technology Organisation (ANSTO), Kirrawee, NSW 2232, Australia.*

**Table S1**

Parameters derived from ensemble optimisation modelling using Advanced EOM 2.0\* for wild-type and mutant  $\alpha$ -syn in the absence and presence of  $\text{Cu}^{2+}$  and the anti-fibril agent VK7

| Protein                      | Average $R_g$ Å of ensemble | Average $D_{\max}$ Å of ensemble | $\chi$ |
|------------------------------|-----------------------------|----------------------------------|--------|
| Wild-type                    | 44.34                       | 129.13                           | 1.1    |
| A30P                         | 28.30                       | 84.69                            | 0.94   |
| E46K                         | 39.46                       | 115.23                           | 0.93   |
| A53T                         | 41.75                       | 124.16                           | 1.1    |
|                              |                             |                                  |        |
| Wild-type + $\text{Cu}^{2+}$ | 28.81                       | 79.94                            | 1.2    |
| A30P + $\text{Cu}^{2+}$      | 26.88                       | 81.06                            | 1.2    |
| A53T + $\text{Cu}^{2+}$      | 34.03                       | 101.85                           | 0.97   |
|                              |                             |                                  |        |
| 4M4A**                       | 37.97                       | 111.26                           | 1.1    |
| 4M4A + $\text{Cu}^{2+}$      | 25.52                       | 75.48                            | 1.1    |
| Wild-type + VK7              | 36.00                       | 106.49                           | 1.2    |
|                              |                             |                                  |        |

\*Each run generated 1000 ensembles and fitted 50 curves

\*\*The M1A/M5A/M116A/M127A substituted protein

**Figure S1**

Scattering profiles of wild type  $\alpha$ -syn taken across size-exclusion elution absorbance peak to illustrate need to examine each individual profile.

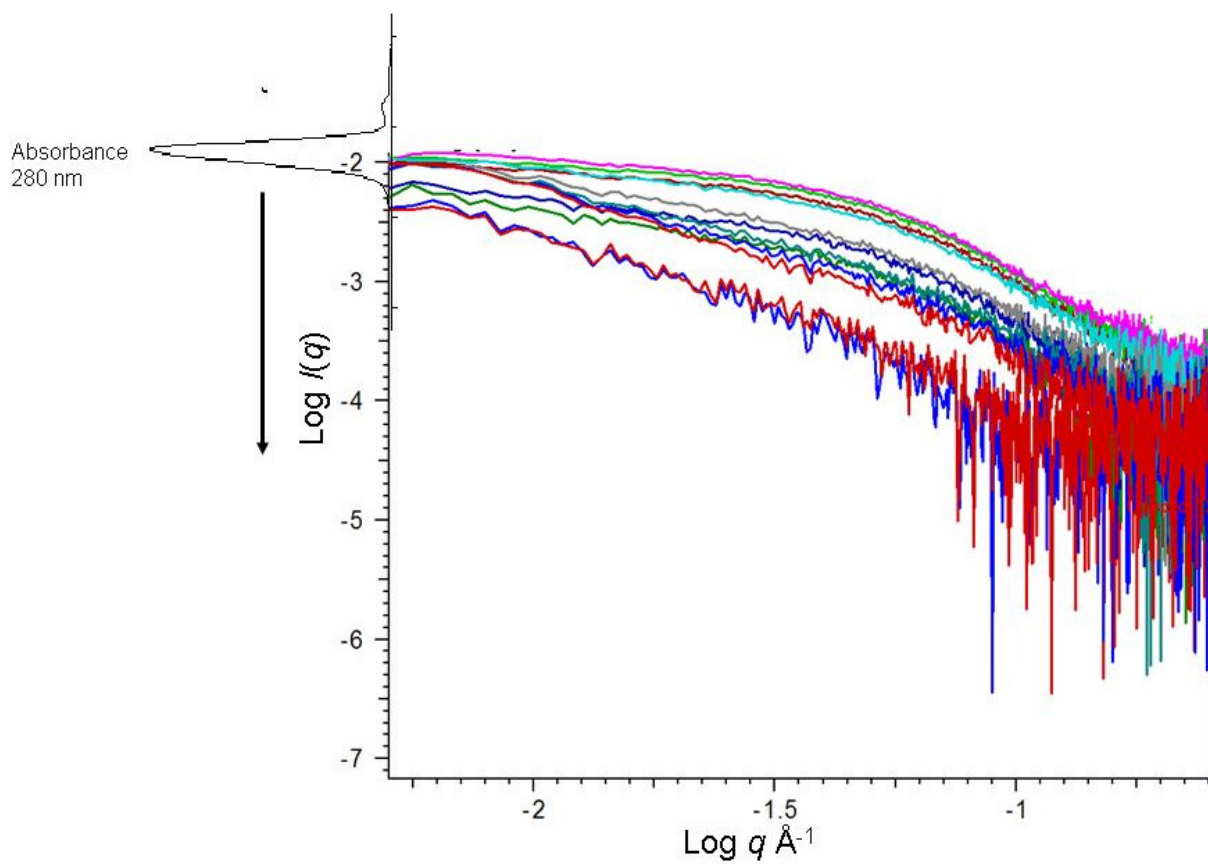

**Figure S2**

Plots of intensity at  $q=0$  ( $I_0$ ) against concentration of protein (millimolar) as estimated from the 280 nm absorption of the SEC peak. Each point is a 2.1 sec snapshot.

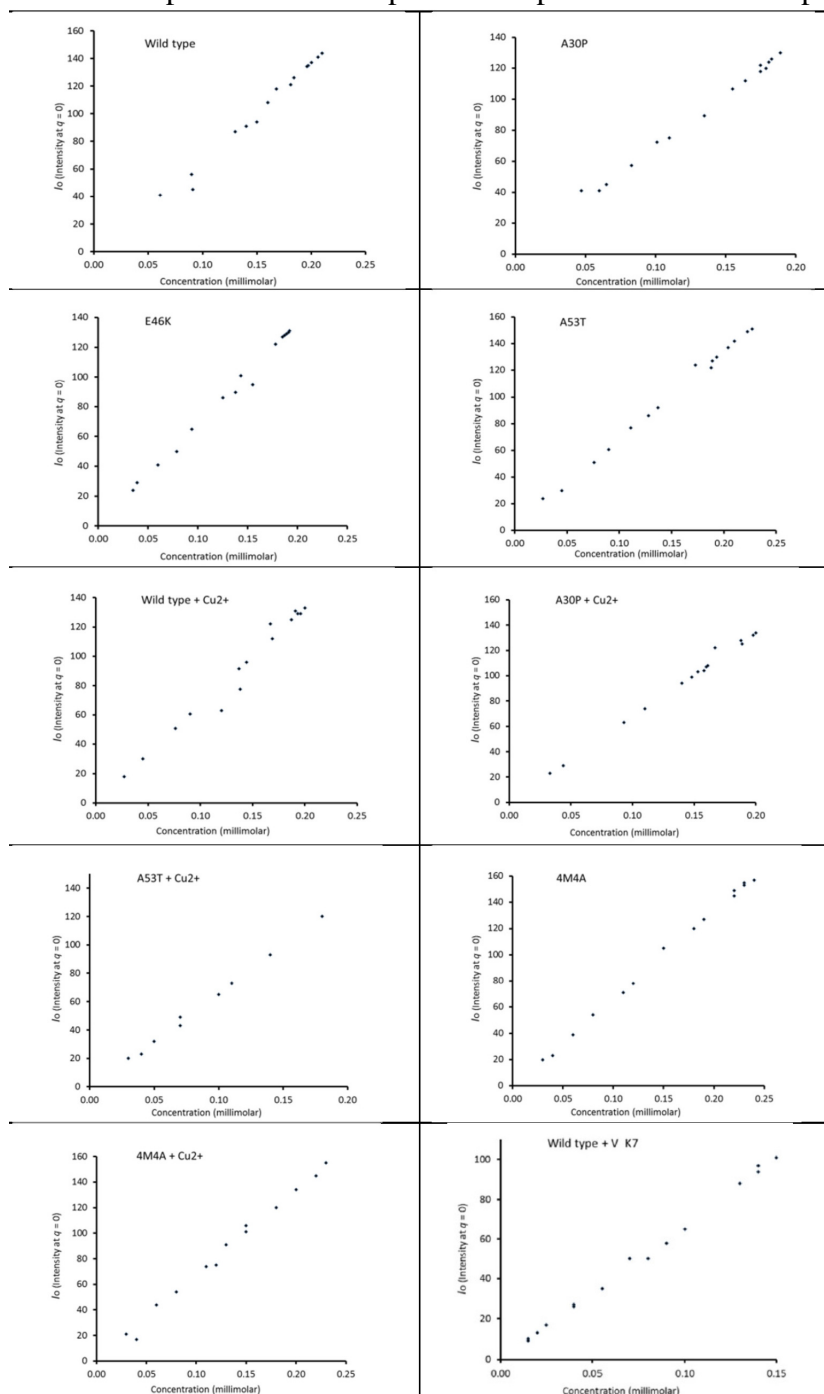

**Figure S3**

Gaussian deconvolutions and cut-offs of  $R_g$  distributions for WT and mutant  $\alpha$ -syn in buffer, +  $\text{Cu}^{2+}$  and WT + VK7

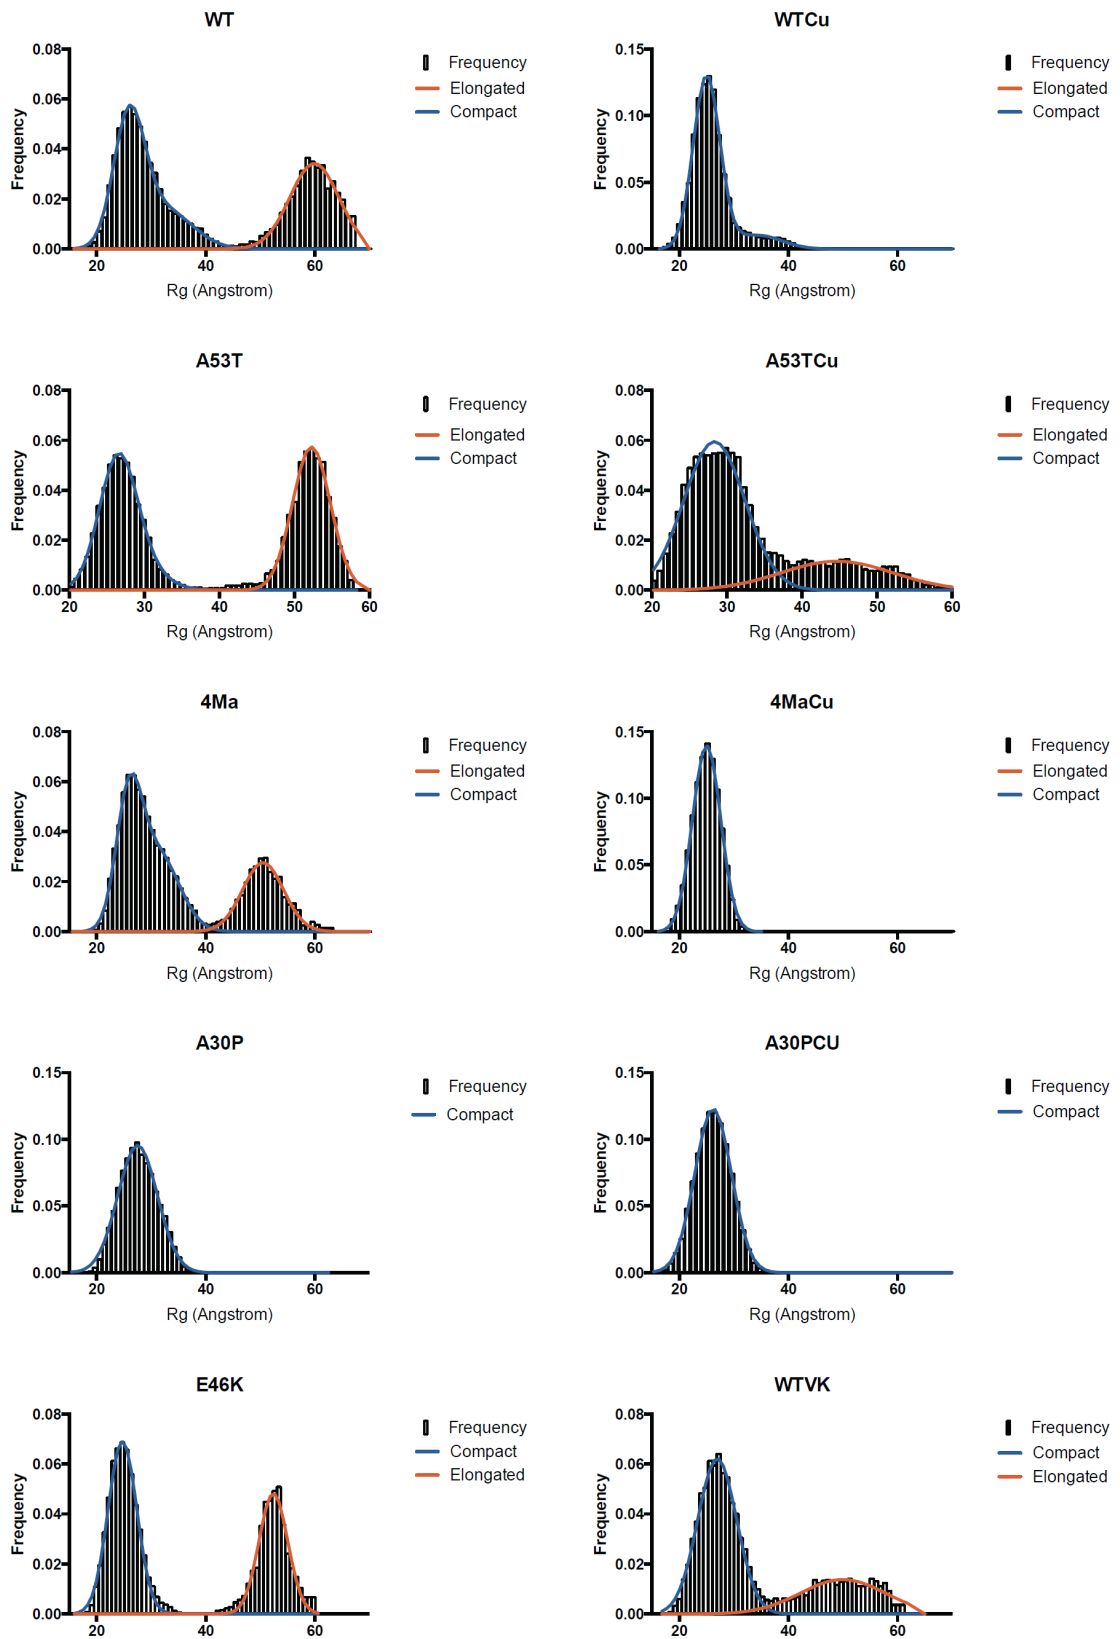

## Figures S4

S4( I) A, Fitted scattering profile of wild-type  $\alpha$ -syn; B, Kratky plot; C,  $D_{\max}$  distribution; D, SE column elution profile; E, Guinier plot.

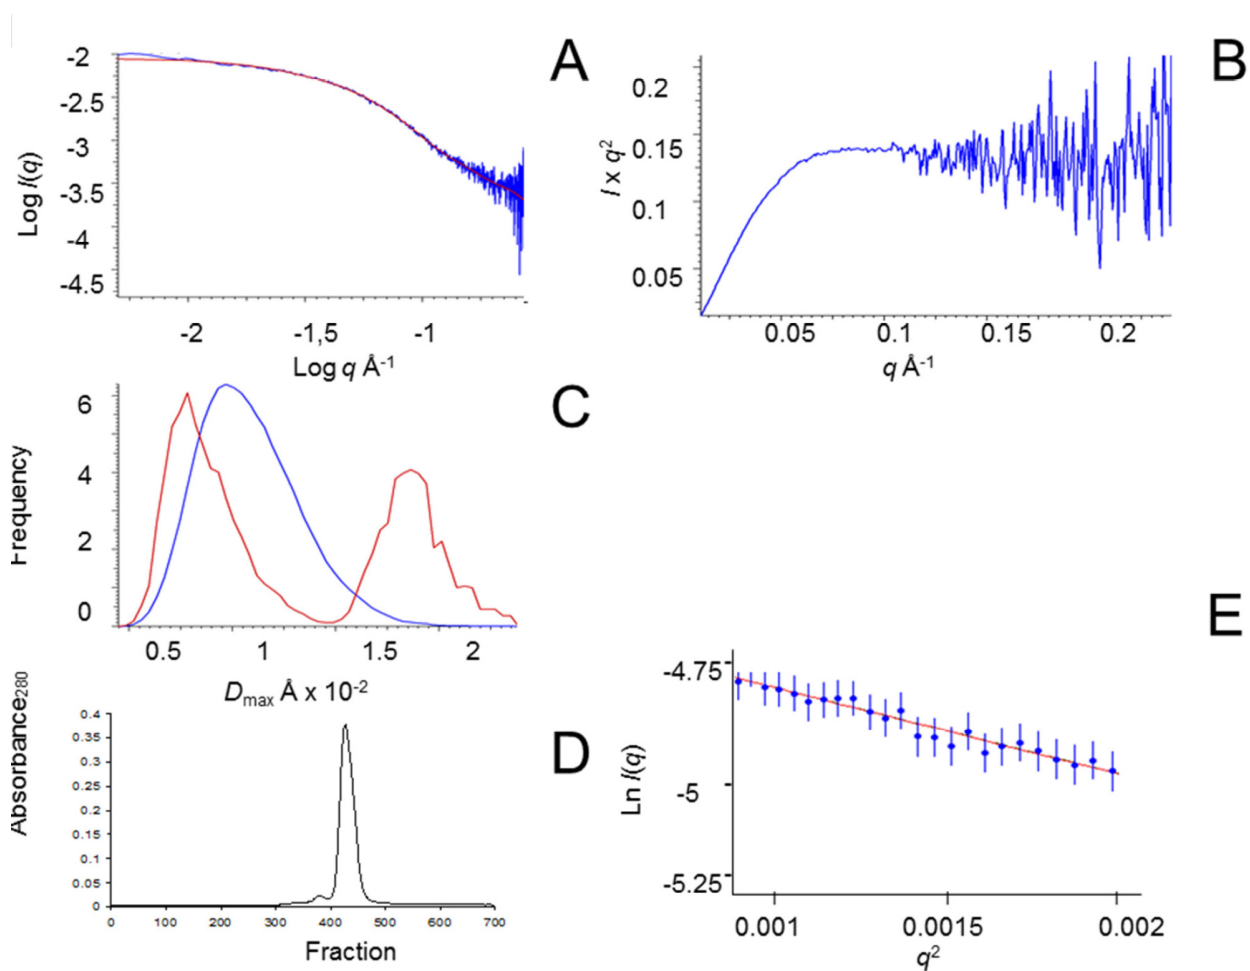

S4 (II) A, Fitted scattering profile of A30P mutant  $\alpha$ -syn; B, Kratky plot; C,  $D_{\max}$  distribution; D, SE column elution profile; E, Guinier plot.

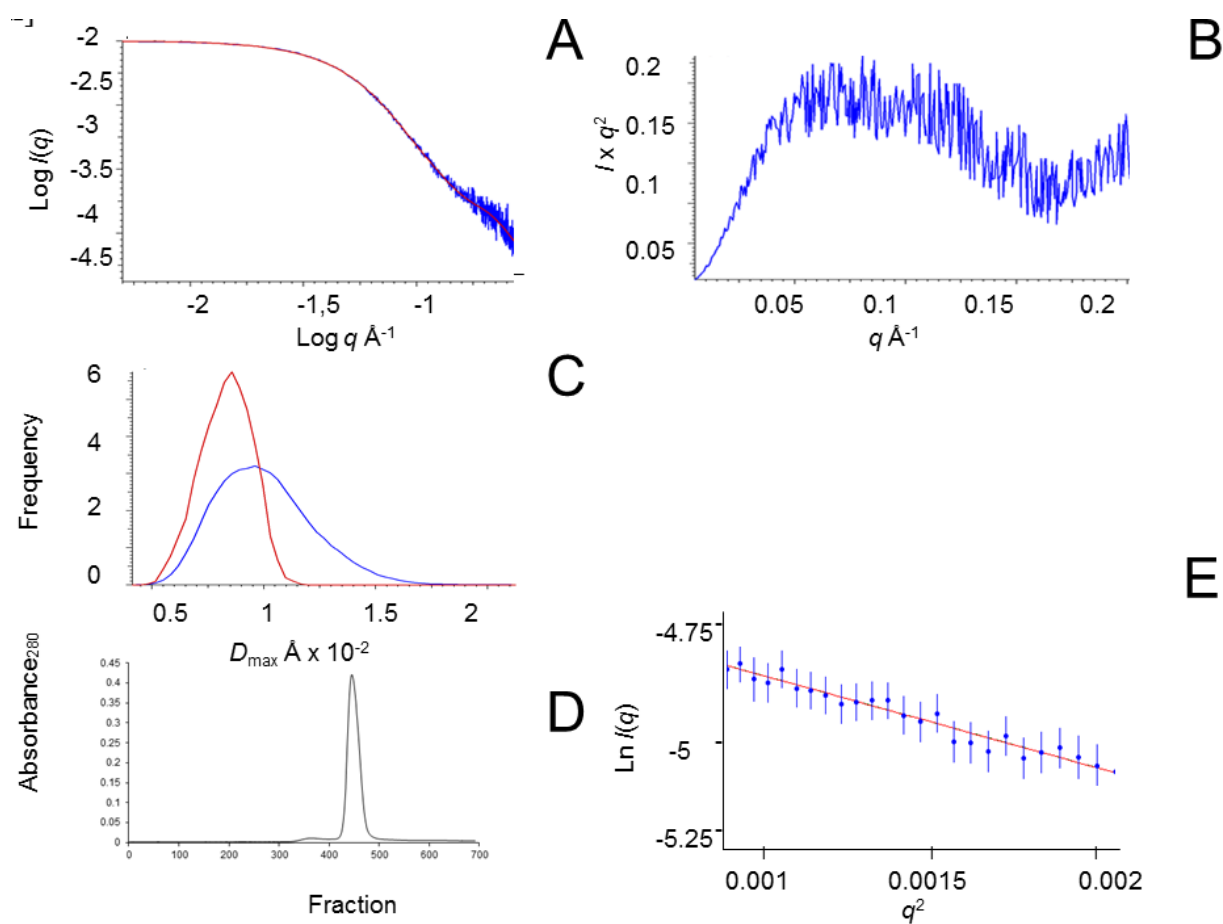

S4 (III) A, Fitted scattering profile of E46K mutant  $\alpha$ -syn; B, Kratky plot; C,  $D_{\max}$  distribution; D, SE column elution profile; E, Guinier plot.

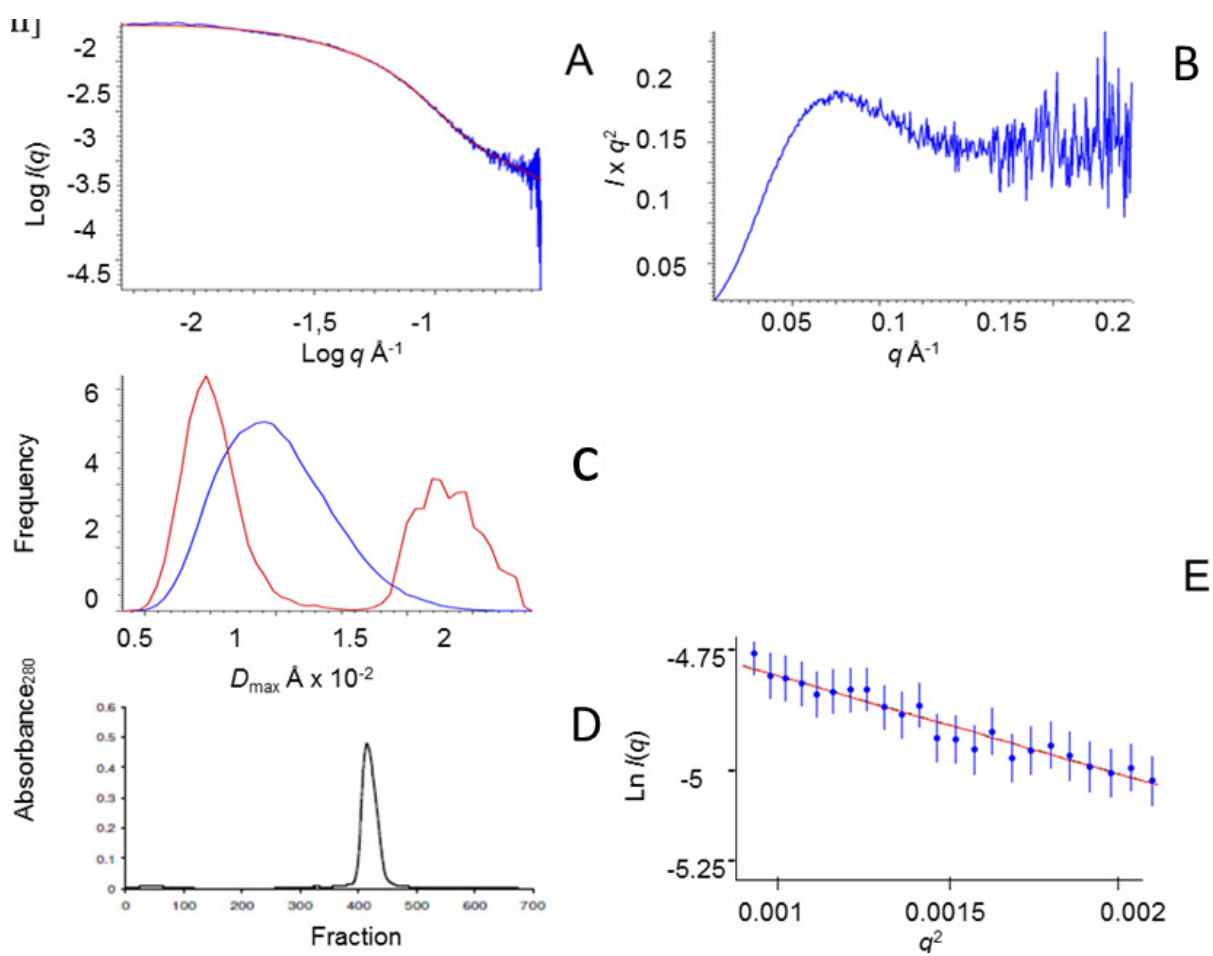

S4 (IV) A, Fitted scattering profile of A53T mutant  $\alpha$ -syn; B, Kratky plot; C,  $D_{\max}$  distribution; D, SE column elution profile; E, Guinier plot.

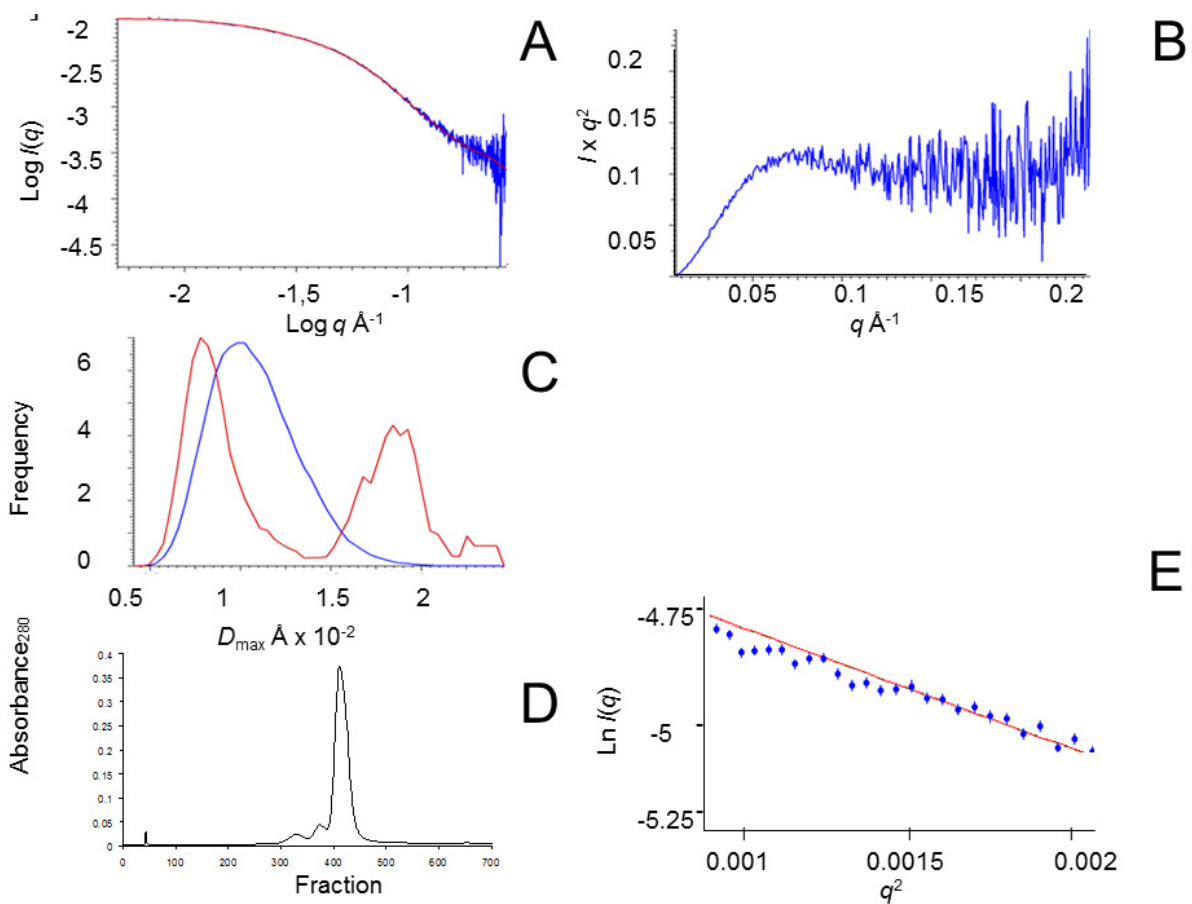



## Figures S5

S5 (I) A, Fitted scattering profile of wild type  $\alpha$ -syn +  $\text{Cu}^{2+}$ ; B, Kratky plot; C,  $D_{\text{max}}$  distribution; D, SE column elution profile; E, Guinier plot.

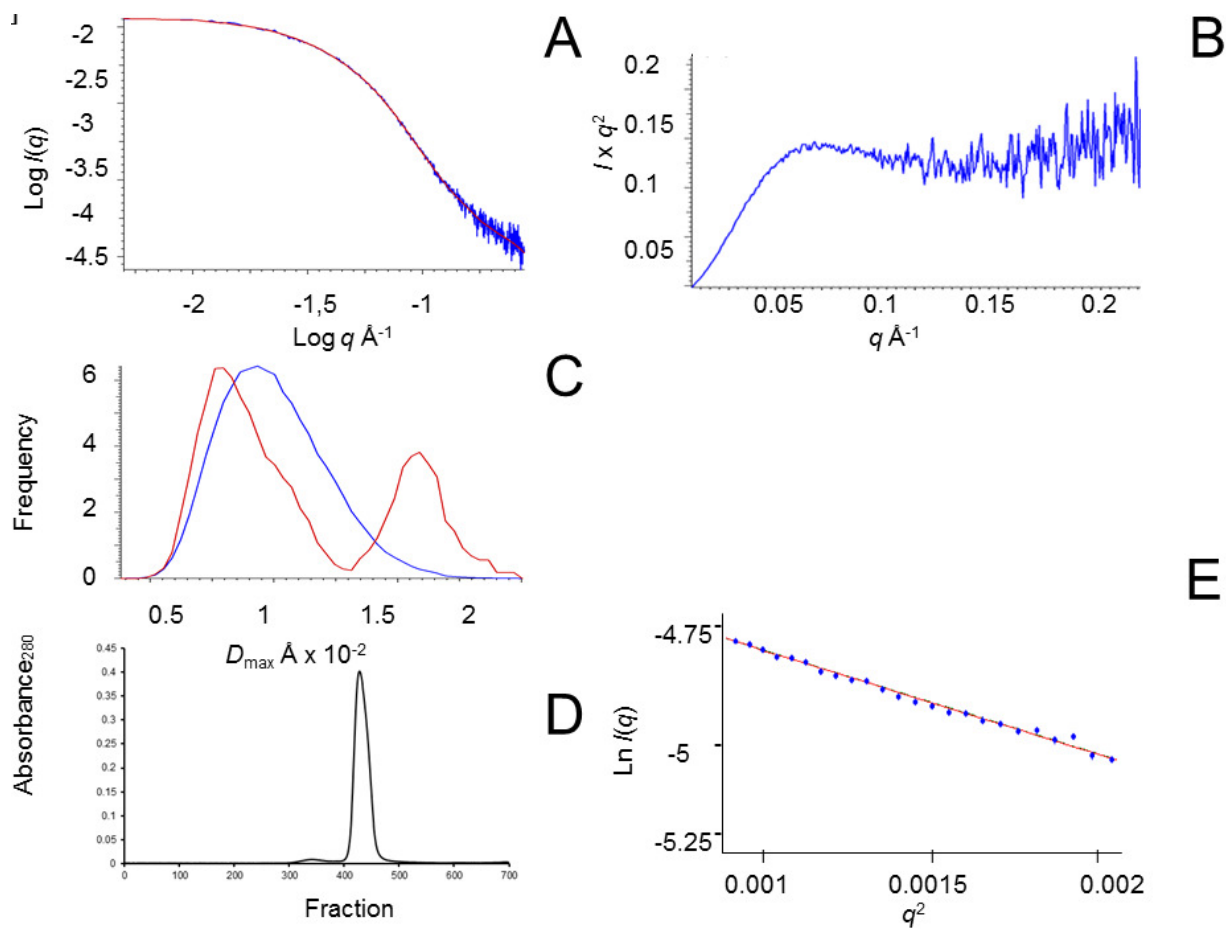

S5 (II) A, Fitted scattering profile of A30P mutant  $\alpha$ -syn +  $\text{Cu}^{2+}$ ; B, Kratky plot; C,  $D_{\text{max}}$  distribution; D, SE column elution profile; E, Guinier plot.

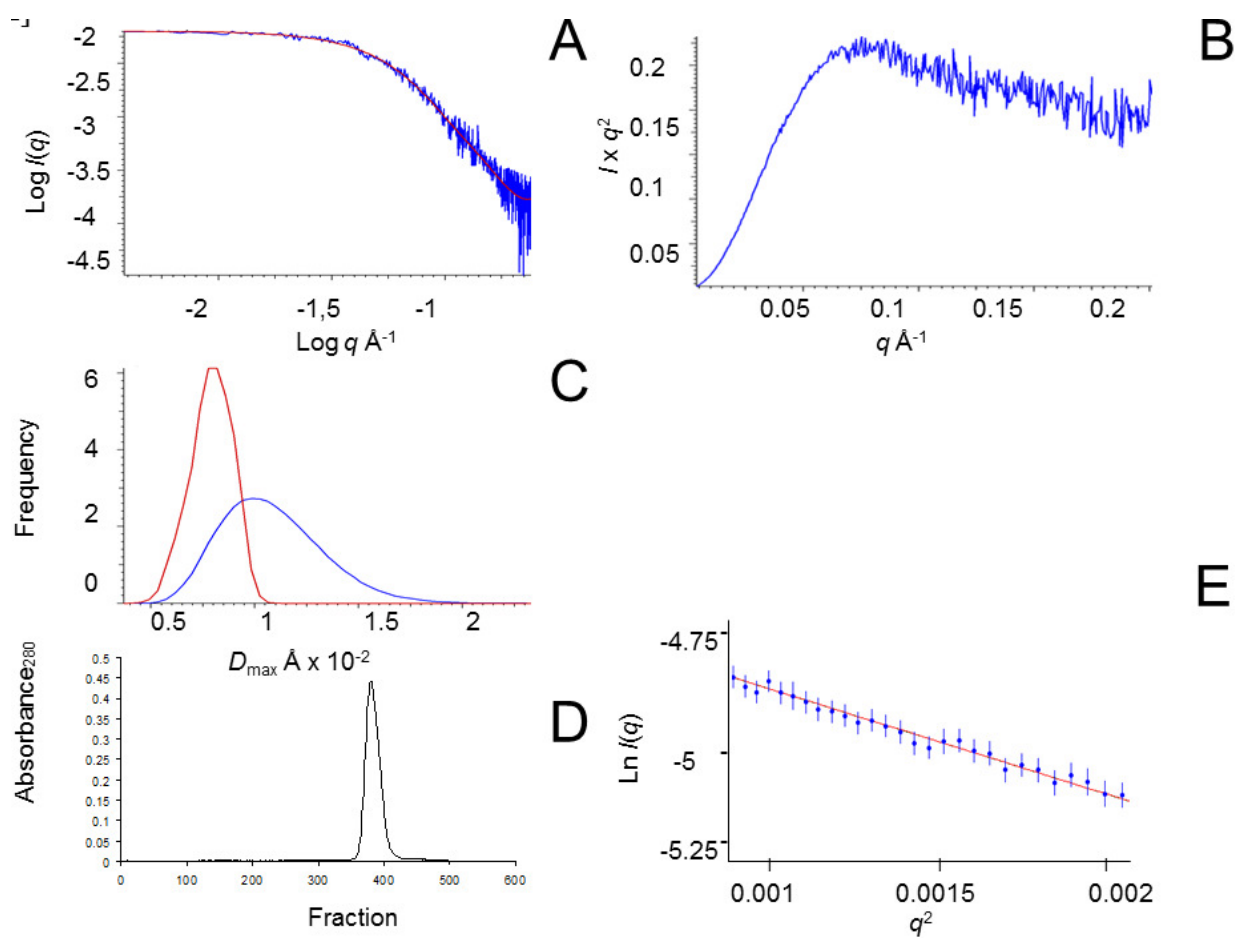

S5(III) A, Fitted scattering profile of A56T mutant  $\alpha$ -syn +  $\text{Cu}^{2+}$ ; B, Kratky plot; C,  $D_{\text{max}}$  distribution; D, SE column elution profile; E, Guinier plot.

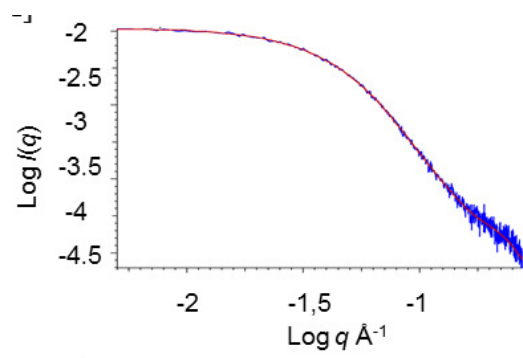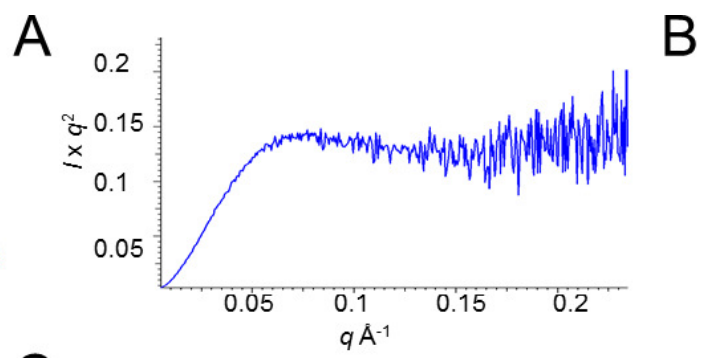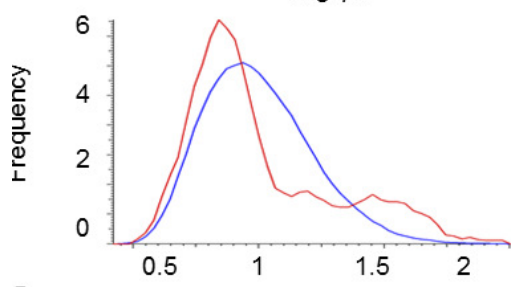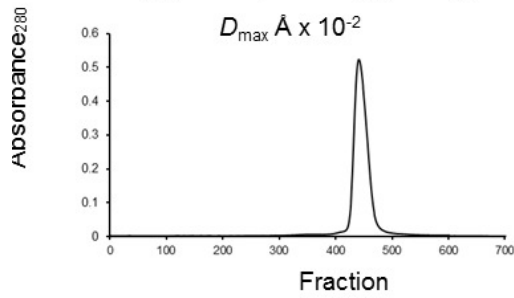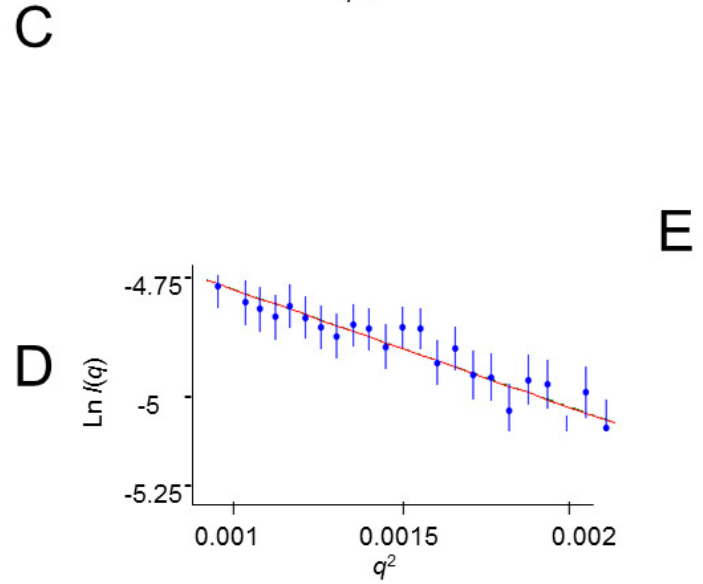

## Figures S6

S6 (I) A, Fitted scattering profile of M1A/M5A/M116A/M127A substituted  $\alpha$ -syn; B, Kratky plot; C,  $D_{\max}$  distribution; D, SE column elution profile; E, Guinier plot.

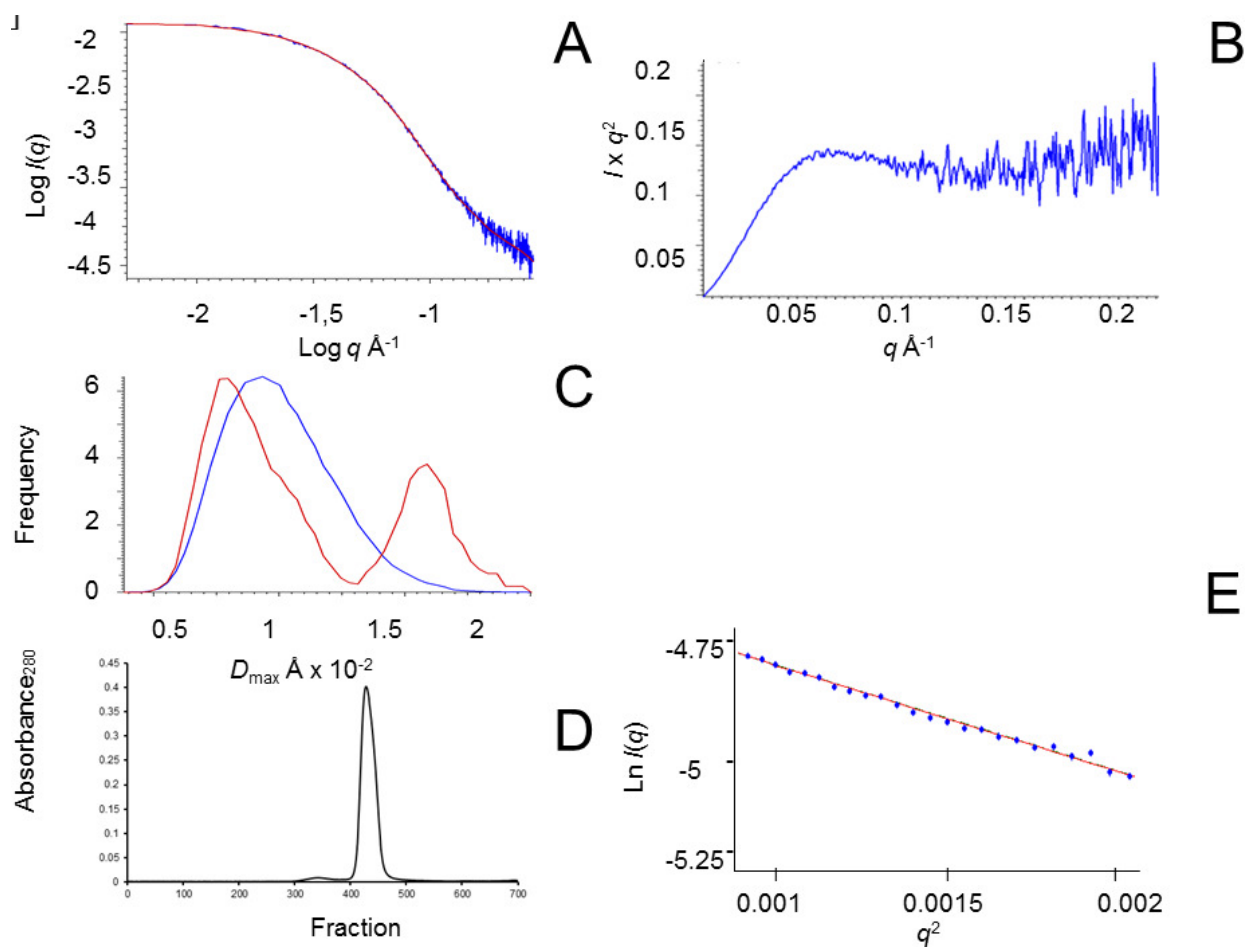

S6 (II) A, Fitted scattering profile of M1A/M5A/M116A/M127A substituted  $\alpha$ -syn +  $\text{Cu}^{2+}$ ; B, Kratky plot; C,  $D_{\text{max}}$  distribution; D, SE column elution profile; E, Guinier plot.

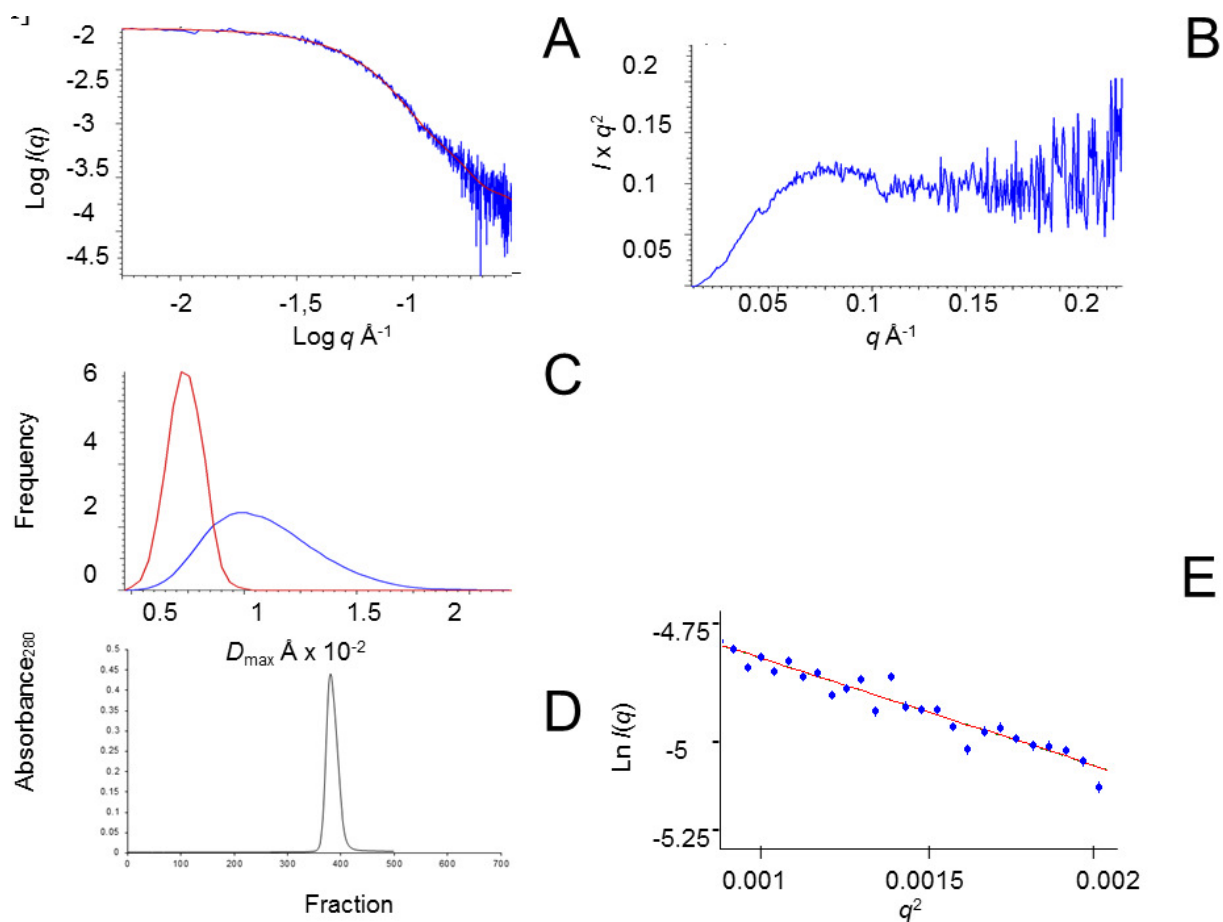

S6 (III) A, Fitted scattering profile of wild-type  $\alpha$ -syn + anti-fibril agent VK7; B, Kratky plot; C,  $D_{\max}$  distribution; D, SE column elution profile; E, Guinier plot.

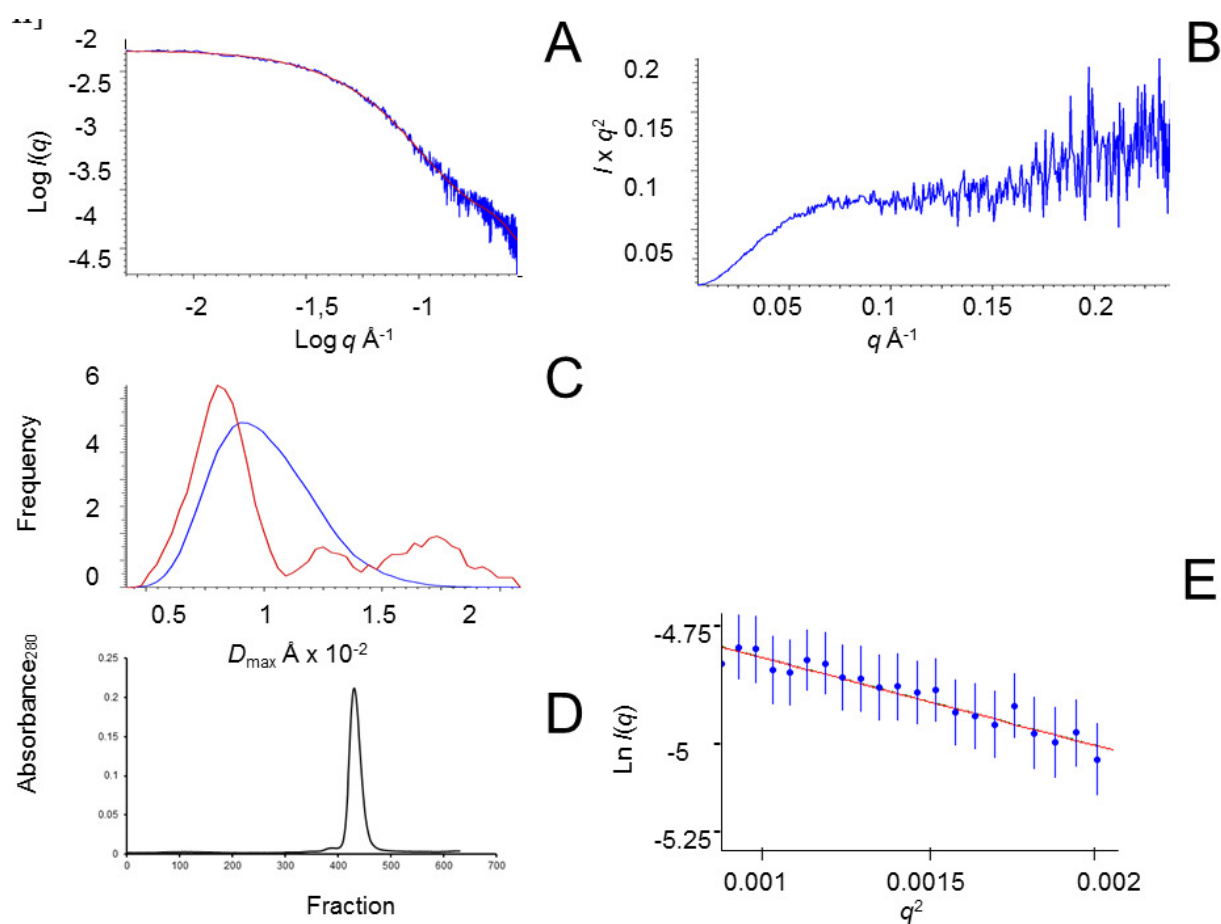

Supplement: c4mb00356j1.pdf [file c4mb00356j1.pdf]
